**The Role of Early Cerebral Edema and Hematoma assessment in Aneurysmal  
Subarachnoid Hemorrhage (a-SAH) in predicting Structural Brain  
Abnormalities in Cognitive Impairments**

Ming-Dong Wang<sup>1,2\*†</sup>, Qian-Hui Fu<sup>3†</sup>, Andrew Ni<sup>7</sup>, Yun-Peng Yuan<sup>4</sup>, Chun-Hui Li<sup>1,2\*</sup>,  
Zhan-Xiang Wang<sup>5</sup>, Hong Wang<sup>6</sup>

<sup>1</sup> Department of Neurosurgery, The First Hospital of Hebei Medical University, No. 89 Donggang Road, Shijiazhuang, 050000, Hebei, China.

<sup>2</sup> Department of Neurosurgery, Hebei Hospital of Xuanwu Hospital Capital Medical University, No. 89 Donggang Road, Shijiazhuang, 050000, Hebei, China.

<sup>3</sup> College of Pharmacy, MINZU university of China, Key Laboratory of Ministry of Education, Ministry of Education (MINZU university of China), Beijing, China, 100081

<sup>4</sup> Department of Neurosurgery, Shanghai Baoshan Hospital of Integrated Traditional Chinese and Western Medicine, No. 181 Youyi Road Baoshan District, 201999, Shanghai, China.

<sup>5</sup> Department of Neurosurgery, The First Affiliated Hospital of Xiamen University, School of Medicine, Xiamen University, Xiamen, Fujian, 361003, China,

<sup>6</sup> Department of Neurosurgery, The Affiliated Hospital of Hebei University, Baoding, Hebei, 071000, China,

<sup>7</sup> Warren Alpert Medical School, Brown University, 222 Richmond St, Providence, RI, 02903, USA.

wangmd815@163.com (M.D.W),

bosswang@vip.sina.com (H.W)

<sup>†</sup>Co-first author, equally contributed, these authors contributed equally to this work

\*Co-Correspondence: Hong Wang, bosswang@vip.sina.com;

\*Correspondence: Ming-Dong Wang, wangmd815@163.com;

Tel.:+86-0311-87156012, Fax. +86-0311-78156012

## **ABSTRACT**

**Background:** Early assessment and management of cerebral edema and hematoma following aneurysmal subarachnoid hemorrhage (a-SAH) can significantly impact clinical cognitive outcomes. However, current clinical practices lack predictive models to identify early structural brain abnormalities affecting cognition. To address this gap, we propose the development of a predictive model termed the a-SAH Early Brain Edema/Hematoma Compression Neural (Structural Brain) Networks Score System (SEBE-HCNNSS).

**Methods:** In this study, 202 consecutive patients with spontaneous a-SAH underwent initial computed tomography (CT) or magnetic resonance imaging (MRI) scans within 24 hours of ictus with follow-up 2 months after discharge. Using logistic regression analysis (univariate and multivariate), we evaluated clinically relevant factors and various traditional scale ratings for cognitive impairment (CI). Risk factors with the highest area under the curve (AUC) values were included in the multivariate analysis and least absolute shrinkage and selection operator (LASSO) analysis or Cox regression analysis.

**Results:** A total of 177 patients were enrolled in the study, and 43 patients were classified with a high SEBE-HCNNSS grade (3 to 5). After a mean follow-up of 2 months, 121 individuals (68.36%) with a-SAH and 3 control subjects developed incident CI. The CT inter-observer reliability of the SEBE-HCNNSS scale was high, with a Kappa value of 1. Furthermore, ROC analysis identified the SEBE-HCNNSS scale (OR 3.322, 95% CI 2.312-7.237,  $p = 0.00025$ ) as an independent predictor of edema, CI, and unfavorable prognosis. These results were also replicated in a validation cohort.

**Conclusion:** Overall, the SEBE-HCNNSS scale represents a simple assessment tool with promising predictive value for CI and clinical outcomes post-a-SAH. Our findings indicate its practical utility as a prognostic instrument for risk evaluation after a-SAH, potentially facilitating early intervention and treatment.

**Keywords:** Cognitive Impairments; aneurysmal Subarachnoid Hemorrhage (a-SAH); Early brain injury; SEBE-HCNNSS

## INTRODUCTION

The latest delineation of subgroups within the subarachnoid space provides a theoretical basis for more accurate diagnosis and treatment of subarachnoid hemorrhage (SAH)<sup>1</sup>. Specifically, aneurysmal subarachnoid hemorrhage (a-SAH) is a subtype of hemorrhage stroke associated with high morbidity and mortality, constituting a significant cause of neurological disease<sup>1,2</sup>. Common complications following a-SAH include early brain injury (EBI), symptomatic vasospasm, brain edema, delayed cerebral ischemia (DCI), delayed deficits, and cognitive impairments (CI)<sup>3,4,5</sup>. Despite advancements enhancing outcomes post-SAH, CI still affects 25% to 40% of stroke survivors<sup>6,7</sup>, and the precise risk factors and mechanisms underlying CI in SAH patients remain elusive.

Cognitive dysfunction can show substantial short-term variability within individuals<sup>8</sup>. Furthermore, in pathological conditions like a-SAH, structural brain abnormalities, such as cerebral edema and DCI, are strongly linked with the risk of developing CI<sup>9,10</sup>. Consequently, solely assessing cognitive performance can yield misleading conclusions<sup>11</sup>. At present, there is a lack of consensus on evaluation and detection tools for structural brain abnormalities (cerebral hematoma, edema) in CI. Although the Fisher scale on admission has been identified as an independent predictor for severe CI<sup>12</sup>, its correlation with structural brain abnormalities and subsequent CI, evaluated using Montreal Cognitive Assessment (MoCA) and Mini-Mental State Examination (MMSE), remains unknown.

Despite growing attention on EBI, defined as injury in the first 72 hours after SAH<sup>13</sup>, early evaluation of nerve fiber tracts has been overlooked. Typically, classification systems are grounded in accepted principles specific to their respective field. At present, a shortened version of MoCA has been used as the initial assessment tool for CI in patients through the recommendation of consensus conference guidelines<sup>14</sup>. However, this fails to capture the multifaceted nature of CI rooted in brain network functionalities. Cognitive processes, intricate and multifactorial, hinge on functional specificity, connectivity, brain architectonics, and topographic

organization of brain areas<sup>15,16,17</sup>. Thus, functional brain network classification, delineating macro-scale networks, offers promise in understanding CI mechanisms. Six macro-scale functional brain networks have been delineated: the occipital network (ON), pericentral network (PN), dorsal frontoparietal network (D-FPN), lateral frontoparietal network (L-FPN), midcingulo-insular network (M-CIN), and medial frontoparietal network (M-FPN)<sup>18</sup>. Hence, this necessitates an alternative clinically useful marker for predicting CI using these macro-scale networks.

In this study, we aim to introduce a readily available, novel, radiographic scoring system, the a-SAH Early Brain Edema/Hematoma Compression Neural Networks Score System (SEBE-HCNNSS), to assess CI attributed to early brain damage and compression of neural networks. Modeled after the SEBES grade for early brain edema, the SEBE-HCNNSS is a semiquantitative CT grading scale. We hypothesize that this system not only accurately reflects the clinical grade of early brain edema post-SAH but also predicts the occurrence of CI and eventual clinical outcomes.

## **MATERIALS AND METHODS**

### **Research Design and Study Population**

The cognitive evaluation study enrolled 202 participants aged 18 to 70 diagnosed with a-SAH between Jan 2021 and Jan 2023. For this analysis, we used a case-cohort design. We excluded 25 participants who did not meet the predefined criteria, and the final analysis was performed on a cohort of 177 individuals. The study protocol was approved by the Institutional Review Board (Clinical Research Ethics Committee of the First Hospital of Hebei Medical University, ID: 2023-1001), and all participants and their proxies provided written informed consent.

Inclusion criteria: 1) first-ever stroke, diagnosed with SAH via CT scan within 24–48 hours or lumbar puncture; 2) age between 18 and 70 years; 3) Confirmation of cerebral aneurysm by digital subtraction angiography (DSA) and/or CT angiography (CTA); 4) absence of neurological or psychiatric disease history and each unruptured intracranial aneurysm patient must be admitted to the hospital in excellent

preoperative and pre-interventional condition; 5) Informed consent is signed by the patient and/or family.

Exclusion Criteria: 1) patients over 70 years old; 2) presence of neurological focal deficits or severe aphasia; 3) cognitive dysfunction or history of cognitive decline including craniotomy, antipsychotics, neurodegenerative diseases, and chronic subdural hematoma; 4) concurrent acute or chronic infections, corneal or pupillary abnormalities, severe autoimmune or systemic diseases such as rheumatic illnesses of the musculoskeletal system; 5) concurrent severe organic dysfunction; 6) patients with recurrent aneurysms or aneurysms not first diagnosed in our hospital; 7) diagnosis of major psychosis according to the Diagnostic and Statistical Manual of Mental Disorders, 4th Edition criteria<sup>19</sup>.

### **Cognitive Assessment and Diagnosis Procedure**

At the 2-month post-discharge mark, each participant underwent comprehensive neuropsychological testing using either MoCA or MMSE, which included a broad spectrum of cognitive domains such as construction, memory, attention, visual structural skills, language, abstract thinking, calculation, executive functions, psychomotor speed, and intellectual functioning. The MoCA scale ranges from 0 to 30 points, with 26–30 points classified as normal and <26 points classified as CI. The MMSE scale ranges from 0 to 30 points, with scores of 27–30 classified as normal, 21–26 as mild CI, 10–20 points as moderate CI, and 0–9 points as severe CI<sup>20</sup>. The MoCA scale was used to evaluate CI in the training cohort while the MMSE scale was used to evaluate CI in the validation cohort. The utilization of distinct cognitive assessment scales in the training and validation cohorts aimed to validate and enhance the robustness of findings across different cohorts and assessment tools, ensuring a comprehensive evaluation of cognitive impairment post-discharge.

### **Clinical Variables**

Clinical variables were selected based on previous recommendations which included general risk factors, baseline demographic data, and vascular risk factor data<sup>1</sup>. This included gender, age, blood pressure, lipid profile, glucose levels, smoking history, surgical time, aneurysm location and size, initial severity of bleed, clinical

markers of EBI, SEBES scale<sup>21</sup>, Hunt-Hess scale<sup>22</sup>, modified Fisher grade, and Glasgow Coma Scale (GCS) at time of admission, and MoCA and MMSE at 2-months post-discharge (Details in online supplemental materials, Clinical Variables).

### **Radiographic Variables and SEBES-HCNNSS Criteria**

The first available pretreatment and follow-up CT scan (within 24 hours of ictus) were reviewed by one of the authors (M.D.W) with fragment checking, manual correction, manual outlining, and insertion of identified cognitive networks following Fisher's hierarchical classification and SEBES rules (Details in online supplemental materials, Radiographic Variables).

We defined SEBES-HCNNSS on a scale from 0 to 5 points. The SEBES-HCNNSS score was determined by assessing the absence of visible sulci either because of effacement of sulci or loss of gray white differentiation at 2 predetermined levels in each hemisphere<sup>21</sup>: (1) Areas before the level of the insular cortex where the thalamus and basal ganglion are visible, including D-FPN, L-FPN, M-FPN and (2) areas of M-CIN in the periphery at the level of the lateral ventricle, including PN, ON and M-CIN (Table 1) (Details in online supplemental materials, Radiographic Variables).

### **Localization of a-SAH**

We also performed precise localization of the a-SAH (aneurysm location), as detected by CT, by manually tracing the hematoma or cerebral edema borders onto a template of brainstem nuclei in standard Montreal Neurological Institute space (The Harvard Ascending Arousal Network Atlas, [www.martinos.org/resources/aan-atlas](http://www.martinos.org/resources/aan-atlas)). Affected regions, including the L-FPN, PFCs, IFJ, IPL, M-CIN, and AI were delineated (Figure 1, online supplemental materials, Radiographic Variables).

### **Validation cohort**

A separate validation cohort comprised patients admitted with SAH subsequent to the initial cohort. The same inclusion criteria were applied to assess the prognostic value of SEBE-HCNNSS in predicting edema, hematoma, cognitive impairment, and unfavorable long-term prognosis.

**Table 1.** a-SAH Early Brain Edema/Hematoma Compression Neural Networks Score System (SEBE-HCNNSS)

Criteria

| Description of subarachnoid blood on cranial CT                                                                                                                                                                                                                                                                                                                                                      | Maximum Score |
|------------------------------------------------------------------------------------------------------------------------------------------------------------------------------------------------------------------------------------------------------------------------------------------------------------------------------------------------------------------------------------------------------|---------------|
| No visible blood, no effacement, and no widening of the longitudinal fissure of the brain.                                                                                                                                                                                                                                                                                                           | 0             |
| Absence of visible sulci due to effacement, diffuse deposits, or thin layers of blood at specified brain locations (L-FPN or D-FPN or M-FPN or PN or ON or M-CIN or other), or widening of the longitudinal fissure.                                                                                                                                                                                 | 1             |
| Localized/diffuse blood deposits (<1 mm thick) at specified locations (L-FPN or D-FPN or M-FPN or PN or ON or M-CIN or other) in each section, without visible sulci in those areas at two predetermined levels in each hemisphere.                                                                                                                                                                  | 2             |
| For specified locations (L-FPN or D-FPN or M-FPN or PN or ON or M-CIN or other) in each section, absence of visible sulci at two predetermined levels in each hemisphere or disruption of the grey-white matter junction, with blood pooling (<1 mm thick) in ventricles or cerebral pools (insular pools, circumferential pools, lateral fissure pools, interpeduncular pools, lateral ventricles). | 3             |
| Disappearance of sulci at two predetermined levels in each hemisphere or localized clots/thick blood layers ( $\geq 1$ mm) within ventricles at specified brain locations (L-FPN or D-FPN or M-FPN or PN or ON or M-CIN or other).                                                                                                                                                                   | 4             |
| Diffuse subarachnoid hemorrhage or absence of it with intracerebral/intraventricular blood clots at specified brain locations (L-FPN or D-FPN or M-FPN or PN or ON or M-CIN or other)                                                                                                                                                                                                                | 5             |

## Statistical Analysis

Parametric screening of univariate analyses was conducted for the MoCA and MMSE score groups (training and validation sets) to identify significant differences and independent risk factors associated with CI. Multivariate regression models were used to explore correlations between independent risk factors and CI. Target variables were further identified using LASSO regression analyses. Six distinct brain structure regions were incorporated in the regression model to assess their ability to predict cognitive domain dependence and recurrence of vascular events. The accuracy of the SEBE-HCNNSS scale was evaluated against existing scales using receiver operating characteristic curves (ROCs), calibration plots, and dynamic component

analysis/decision curve analysis (DCA) to ascertain its ability to predict the occurrence of edema, infarction and CI after SAH. This was done to determine which scale had the best combination of specificity and sensitivity so the best scale could be selected. We compared the models by determining the net categorical improvement rate and the combined discriminant improvement rate to select the best model. For the results of the MoCA and MMSE scale groups, we adjusted for location, size, Fisher grading, Hunt-Hess scale, EBES scale, GCS scale, and surgical approach. Cox proportional hazards models were used for all analysis phases. Statistical significance was determined by a two-tailed  $\alpha$  of 0.05 in the first and second stages of analysis. In the third stage of analysis, Bonferroni adjustment was performed for multiple comparisons and an  $\alpha$  level of 0.05 was used (Details in online supplemental materials, Statistical Analysis).

## **RESULTS**

### **Participants characteristics**

The study population consisted of 177 individuals meeting the inclusion criteria (67 male, 110 females, mean age  $56.45 \pm 11.77$  years), including aneurysm cases (a-SAH) and control subjects with unruptured intracranial aneurysms (UIA) (12 males, 13 females; mean age  $53.04 \pm 15.60$  years) (Table 2). Characteristics of the total study population and study population stratified by group are presented in Table 2. The mean age of the overall cohort was  $57.01 \pm 10.98$  years and 63.80% were female. Endovascular coiling was employed in 132 (74.58%) cases, while 37 (21.47%) cases underwent surgical clipping. The time from ictus onset to first CT was within 24 hours after admission. In addition, 148 (83.62%) ruptured aneurysms were in the anterior circulation and 29 (16.37%) ruptured aneurysms were in the posterior circulation. There were no significant differences between the two groups ( $p > 0.05$ ) across the different variables, except for time from onset to surgery, which was shorter in the a-SAH group (OR=238.286, 95% CI=29.933–1896.887,  $p < 0.05$ ). At the 2-month follow-up, 4 patients with UIA (16%) and 120 patients with a-SAH (78.43%) developed CI.

### **Univariate and multivariate regression & LASSO analysis**



We performed univariate analysis of 16 indicators. Among them, smoking, time of onset to surgery, Hunt-Hess grade, GCS scale, Fisher CT grade, EBES scale, were significantly associated ( $p < 0.05$ ) with CI prognosis in the a-SAH group compared to the control group (Table S1).

**Table 2.** Evaluation of Baseline Characteristics of 177 Participants in the Case-Cohort Study

| Characteristics (Variable)      | Participants (n=177) |               | Odds Ratio (95%CI)        | p-value   |
|---------------------------------|----------------------|---------------|---------------------------|-----------|
|                                 | UIA (n=25)           | a-SAH (n=152) |                           |           |
| <b>Gender, male (37.85%)</b>    |                      |               | 1.645 (0.702–3.853)       | 0.252     |
| Male                            | 12 (48%)             | 55 (36.18%)   |                           |           |
| Female                          | 13 (52%)             | 97 (63.825)   |                           |           |
| <b>Age, year</b>                |                      |               | 0.515 (0.183–1.452)       | 0.21      |
| <65                             | 20 (80%)             | 53 (34.87%)   |                           |           |
| ≥65                             | 5 (20%)              | 99 (65.13%)   |                           |           |
| <b>Current Smoking (19.21%)</b> |                      |               | 0.496 (0.14–1.759)        | 0.278     |
| Smoking                         | 3 (12%)              | 31 (20.39%)   |                           |           |
| Not Smoking                     | 22 (88%)             | 121 (79.61%)  |                           |           |
| <b>SBP, mmHg</b>                |                      |               | 1.091 (0.46–2.584)        | 0.843     |
| High                            | 14 (56%)             | 88 (57.89%)   |                           |           |
| Normal                          | 11 (44%)             | 64 (42.11%)   |                           |           |
| <b>LDL cholesterol, mmol/L</b>  |                      |               | 1.617 (0.587–4.452)       | 0.353     |
| High                            | 6 (24%)              | 25 (16.45%)   |                           |           |
| Normal                          | 19 (76%)             | 127 (83.55%)  |                           |           |
| <b>Blood Sugar</b>              |                      |               | 1.344 (0.46–3.927)        | 0.589     |
| High                            | 5 (20%)              | 24 (15.79%)   |                           |           |
| Normal                          | 20 (80%)             | 128 (84.21%)  |                           |           |
| <b>Time of onset to surgery</b> |                      |               | 238.286 (29.933–1896.887) | 2.325E-07 |
| ≥24h                            | 24(96%)              | 14 (0.09%)    |                           |           |
| <24h                            | 1 (4%)               | 138 (90.79%)  |                           |           |
| <b>Aneurysm location</b>        |                      |               | 0.927 (0.771–1.115)       | 0.419     |
| PCOA                            | 2 (8%)               | 31 (20.39%)   |                           |           |
| ACOA                            | 4 (16%)              | 24 (15.79%)   |                           |           |
| PCA                             | 4 (16%)              | 16 (10.53%)   |                           |           |
| MCA                             | 5 (20%)              | 25 (16.45%)   |                           |           |
| ACA                             | 4 (16%)              | 21 (13.81%)   |                           |           |
| ICA                             | 2 (8%)               | 14 (9.21%)    |                           |           |
| AChA                            |                      | 3 (1.97%)     |                           |           |
| BA                              | 2 (8%)               | 7 (4.61%)     |                           |           |
| SCA                             |                      | 2 (1.32%)     |                           |           |
| No-angiography/negatives        | 2 (8%)               | 9 (5.92%)     |                           |           |
| <b>Aneurysm type</b>            |                      |               | 2.38 (0.457–12.398)       | 0.303     |
| No saccular aneurysm            | 2 (8%)               | 1 (0.66%)     |                           |           |
| Saccular aneurysm               | 21 (84%)             | 143 (94.08%)  |                           |           |

|                                 |           |              |                     |            |
|---------------------------------|-----------|--------------|---------------------|------------|
| <b>No-angiography/negatives</b> | 2 (8%)    | 8 (5.26%)    |                     |            |
| <b>Aneurysm size</b>            |           |              | 0.952 (0.604–1.501) | 0.834      |
| <3mm                            | 6 (24%)   | 32 (21.05%)  |                     |            |
| 3–7mm                           | 14 (56%)  | 83 (54.61%)  |                     |            |
| 7–10mm                          |           | 16 (10.53%)  |                     |            |
| >10mm                           | 3 (12%)   | 10 (6.58%)   |                     |            |
| <b>No-angiography/negatives</b> | 2 (8%)    | 11 (7.24%)   |                     |            |
| <b>Hunt–Hess scale</b>          |           |              | 0.21 (0.097–0.458)  | 0.000085   |
| Grade 1                         | 16 (64%)  | 60 (39.47%)  |                     |            |
| Grade 2                         | 3 (12%)   | 46 (30.26%)  |                     |            |
| Grade 3                         | 3 (12%)   | 30 (19.74%)  |                     |            |
| Grade 4                         | 3 (12%)   | 12 (7.89%)   |                     |            |
| Grade 5                         |           | 4 (2.63%)    |                     |            |
| <b>GCS scale</b>                |           |              | 0.088 (0.04–0.195)  | 2.3414E-09 |
| 12–15 points                    | 11        | 110          |                     |            |
| 11–14 points                    | 14        | 33           |                     |            |
| 9–11 points                     |           | 33           |                     |            |
| 3–8 points                      |           | 9            |                     |            |
| <3 points                       |           |              |                     |            |
| <b>Fisher CT grade</b>          |           |              | 0.192 (0.103–0.357) | 1.7915E-07 |
| Grade 0                         | 25 (100%) | 9 (5.92%)    |                     |            |
| Grade 1                         |           | 20 (13.16%)  |                     |            |
| Grade 2                         |           | 55 (36.18%)  |                     |            |
| Grade 3                         |           | 41 (26.97%)  |                     |            |
| Grade 4                         |           | 27 (17.76%)  |                     |            |
| <b>MMSE scale</b>               |           |              | 0.051 (0.016–0.159) | 2.87E-07   |
| <27 points (CI)                 | 4 (16%)   | 120 (78.43%) |                     |            |
| 27–30 points (Normal)           | 21 (84%)  | 32 (21.57%)  |                     |            |
| <b>MoCA scale</b>               |           |              | 0.039 (0.011–0.139) | 5.32E-07   |
| <26 points (CI)                 | 3 (12%)   | 118 (77.13%) |                     |            |
| ≥26 points (Normal)             | 22 (88%)  | 34 (22.87%)  |                     |            |
| <b>EBES scale</b>               |           |              | 0.131 (0.052–0.331) | 0.000016   |
| Grade 0                         | 25 (100%) | 31 (20.39%)  |                     |            |
| Grade 1                         |           | 47 (30.92%)  |                     |            |
| Grade 2                         |           | 41 (26.97%)  |                     |            |
| Grade 3                         |           | 23 (15.13%)  |                     |            |
| Grade 4                         |           | 10 (6.58%)   |                     |            |
| <b>Surgical modality</b>        |           |              | 0.264 (0.092–0.756) | 0.013      |
| Endovascular coiling            | 22 (88%)  | 110 (72.37%) |                     |            |
| Surgical clipping               | 1 (4%)    | 36 (23.68%)  |                     |            |
| Mix                             |           | 3 (1.97%)    |                     |            |
| No treatment                    | 2 (8%)    | 3 (1.97%)    |                     |            |

In the training set, univariate regression identified independent risk factors associated with CI in the MoCA scale group including time of onset to surgery (OR=3.27, p=0.002), Hunt-Hess grade (OR=1.972, p=0.001), GCS scale (OR=5.601, p=0.004), Fisher CT grade (OR=2.118, p=0.000009), and EBES scale (OR=2.634, p=0.000003) (Table S1.1) In the validation set, univariate regression identified independent risk factors associated with CI in the MMSE scale group including smoking (OR=0.443, p=0.041), time of onset to surgery (OR=3.209, p=0.003), Hunt-Hess grade (OR=1.85, p=0.002), GCS scale (OR=5.111, p=0.006), Fisher CT grade (OR=2.172, p=0.000008), and EBES scale (OR=2.585, p=0.000006) (Table S 1.1). According to the ROC curves, the EBES scale had the largest AUC (AUC=0.836,  $p < 0.0001$ ; Figure S1), with a clinically relevant cutoff at 1.5 points.

Multivariate logistic regression analysis confirmed that endovascular coiling showed a smaller increase in CI compared to surgical clipping in both the MoCA scale groups (B=0.239, 95%CI =0.064–0.89, p=0.033) and MMSE scale groups (B=0.198, 95%CI=0.05–0.782, p=0.021). This suggests endovascular coiling surgery had a protective effect on patients' cognitive function. On the contrary, surgical clipping was associated with a larger increase in CI (B=4.185, 95% CI=1.123–15.594, p=0.33) indicating that patients treated with the craniotomy approach had a higher risk of CI than those that underwent endovascular coiling.

To avoid overfitting, LASSO regression screening was further applied (Figure S2, S3). We utilized ten-fold cross-validation to select the penalty term, lambda. In total, 6 variables were selected, and a Cox regression model was established based on the variables screened by Lasso regression.

### **Measures of LASSO and ROC Curve Analysis**

Data from the MoCA scale group (training set) was further screened using LASSO regression analysis. This yielded five factors including Hunt-Hess grade, EBES scale, GCS scale, Fisher CT Grade, and time of onset to surgery (Table 3) which were subsequently included in the logistic regression analysis below.

The ROC values of the logistic regression are depicted in Figure 2 for the models SEBE-HCNNSS, Hunt-Hess grade, GCS score, Fisher CT grade, and EBES score. In

the training set (MoCA scale group) the ROC values are 0.735(0.66–0.81), 0.651(0.566–0.736), 0.622(0.537–0.707), 0.715(0.633–0.796) respectively.

|                             | AUC   |       | 95% CI          |             | Cut-off |      | Sensitivity (%) |       | Specificity (%) |       |
|-----------------------------|-------|-------|-----------------|-------------|---------|------|-----------------|-------|-----------------|-------|
|                             | MoCA  | MMSE  | MoCA            | MMSE        | MoCA    | MMSE | MoCA            | MMSE  | MoCA            | MMSE  |
| SEBE–<br>HCNNSS             | 0.735 | 0.725 | 0.66–0.81       | 0.647–0.802 | 0.5     | 0.5  | 0.907           | 0.894 | 0.375           | 0.378 |
| Hunt–Hess<br>Grade          | 0.651 | 0.635 | 0.566–0.736     | 0.547–0.782 | 2.5     | 2.5  | 0.318           | 0.318 | 0.083           | 0.089 |
| EBES scale                  | 0.744 | 0.739 | 0.669–<br>0.819 | 0.547–0.782 | 1.5     | 1.5  | 0.519           | 0.515 | 0.167           | 0.156 |
| GCS scale                   | 0.622 | 0.617 | 0.537–<br>0.707 | 0.53–0.704  | 1.5     | 1.5  | 0.302           | 0.295 | 0.063           | 0.067 |
| Fisher CT<br>Grade          | 0.715 | 0.721 | 0.633–<br>0.796 | 0.638–0.803 | 2.5     | 2.5  | 0.473           | 0.47  | 0.146           | 0.133 |
| Time of onset to<br>surgery | 0.61  | 0.61  | 0.512–<br>0.708 | 0.509–0.710 | 0.5     | 0.5  | 0.845           | 0.841 | 0.625           | 0.622 |

**Table 3.** The AUC, Cut-off, sensitivity, specificity from the ROC curve

In the validation set (MMSE scale group) the ROC values are 0.744(0.669–0.819), 0.725(0.647–0.802), 0.635(0.547–0.7823); 0.617(0.53–0.704), 0.721(0.638–0.803), and 0.739(0.663–0.815) respectively.

The calibration test produced S:P values for the models SEBE-HCNNSS, Hunt-Hess Grade, GCS scale, Fisher CT Grade, EBES scale in the training set and validation set of 4.162, 4.403, 3.534, 3.301 and 4.548, 4.794, 3.108, 3.928, respectively. The resulting S:P values for these models in the training and validation sets indicated the robustness and validity of the models.

The corresponding p-values for the Hosmer-Lemeshow test for the five models in the training set were 0.921, 0.261, 0.416, 0.134, and 0.674. In the validation set, the corresponding p-values for the four models were 0.897, 0.144, 0.502, 0.103, and 0.658, respectively. Notably, p-values for all five models exceeded 0.05, indicating excellent model fits and validity. The DCA decision curve indicated threshold probabilities of models SEBE-HCNNSS, Hunt-Hess Grade, GCS scale, Fisher CT Grade, and EBES scale in the validation set of 44.94% to 99.13%, 50.86% to 95.73%, 68.77% to 98.29%, 40.15% to 93.73%, and 51.64% to 97.94%, respectively (Figure

3). These models demonstrated varying thresholds across a wide range of probabilities, emphasizing their utility in predicting CI (Figure 3).

### **Correlations between SEBE-HCNNSS and Neural Fiber Bundles, and Identification of Independent Predictors**

When evaluating intracranial pressure (ICP)-related complications in SAH, such as aneurysm re-bleeding, vasospasm, and ICP elevation (Figure 4, Table S2), the SEBE-HCNNSS was dichotomously assessed after determining a clinically relevant threshold derived from the receiver-operating characteristic (ROC) curve. Variables with  $p < 0.05$  in univariate analyses were included in a stepwise multivariate logistic regression model to identify predictors of CI after a-SAH. The final model indicated notable findings: ACoA=10.492/24.295, PCoA=7.079/13.234, and 3–7mm Aneurysm =162316.229/4503.604 in the training/validation set respectively (Table S2). This suggests that changes in arterial location and aneurysm diameter was associated with an increased risk of CI, potentially attributed to compression of cerebral functional network fiber bundles. Additionally, the GCS scale was an independent predictor of CI (B=3.773, 95% CI=1.221–11.659,  $p=0.021$ )/ (B= 3.51, 95% CI=1.101–11.194,  $p=0.034$ ).

Further analysis revealed a negative correlation between GCS scale and cognitive impairment scores in MMSE and MCOA (Person correlation=-0.185,  $p=0.042$ ; Person correlation=-0.204,  $p=0.025$ ). Notably, the SEBE-HCNNSS score was positively correlated with increased intracranial pressure, with higher intracranial pressure resulting in a higher rating and a correlation coefficient of 0.874 (Figure 4).

### **Evaluating the SEBE-HCNNSS scale in contrast to traditional scale**

The utility of SEBE-HCNNSS may be evaluated with cost-effectiveness studies<sup>23</sup>, supported by empirical evaluations of the impact of using the scale in clinical practice (Figure 5). Determination of net classification improvement using continuous variables in the training set established a cutoff of 1.9 (1.3523–2.448).

SEBE-HCNNSS outperformed Fisher CT Grade, GCS, and Hunt-Hess Grade, while EBES scale showed superiority over SEBE-HCNNSS. Fisher CT Grade outperformed GCS and Hunt-Hess Grade. In the validation set, the cutoff was determined to be 1.7

(0.863–2.536). The EBES scale was superior to SEBE-HCNNSS, and SEBE-HCNNSS showed better performance compared to GCS scale, Hunt-Hess Grade, and Fisher CT Grade (Table 4).

**Table 4.** Comparison of ROC among five model

|                       | ROC value | AUC value           | Z/correlation | p-value  |
|-----------------------|-----------|---------------------|---------------|----------|
| <b>Training set</b>   |           |                     |               |          |
| E                     | 0.519     | 0.744 (0.669–0.819) | 0.5           |          |
| F                     | 0.473     | 0.715 (0.666–0.796) | 2.5           |          |
| G                     | 0.302     | 0.622 (0.537–0.707) | 1.5           |          |
| H                     | 0.326     | 0.651 (0.566–0.736) | 1.5           |          |
| S                     | 0.473     | 0.735 (0.66–0.81)   | 1.5           |          |
| S-E                   |           |                     | 0.246         | 3.01E-09 |
| S-F                   |           |                     | 0.387         | 4.47E-07 |
| S-G                   |           |                     | 0.379         | 7.41E-08 |
| S-H                   |           |                     | 0.455         | 0.000389 |
| <b>Validation set</b> |           |                     |               |          |
| E                     | 0.515     | 0.739 (0.663–0.815) | 0.5           |          |
| F                     | 0.47      | 0.721 (0.638–0.803) | 2.5           |          |
| G                     | 0.295     | 0.617 (0.53–0.704)  | 1.5           |          |
| H                     | 0.318     | 0.635 (0.547–0.723) | 2.5           |          |
| S                     | 0.462     | 0.725 (0.647–0.802) | 1.5           |          |
| S-E                   |           |                     | 0.397         | 3.13E-07 |
| S-F                   |           |                     | 0.457         | 0.000212 |
| S-G                   |           |                     | 0.371         | 4.30E-08 |
| S-H                   |           |                     | 0.261         | 1.46E-09 |

### Prognostic Value of SEBE-HCNNSS for CI and Unfavorable Outcomes

Among the cohort, 121 patients (68.36%) developed incident CI after SAH, and were treated by either endovascular coiling or surgical clipping or both. Notably, 43 patients (24.29%) with CI were classified as high-grade SEBE-HCNNSS, while 134 (75.71%) patients with CI were classified as low-grade SEBE-HCNNSS (Table S4). The incidence of CI increased linearly with increased severity of the SEBE-HCNNSS and edema, especially in patients exhibiting both high-grade SEBE-HCNNSS and vasospasm ( $p < 0.05$ , Figure 5). The AUC of the ROC curve of SEBE-HCNNSS for the prediction of CI, edema was 0.735(0.660-0.810) and 0.725(0.647-0.802) for training and validation sets respectively, which was comparable to the AUC of the Hunt-Hess Grade, EBES, Fisher CT Grade, and GCS models. Moreover, the

prognostic value of the SEBE-HCNNSS scale in predicting CI remained significant regardless of treatment modalities, including clipping ( $r=0.181$ ) and coiling ( $r=-0.178$ ).

### **Predictors for Prognostic Value of SEBE-HCNNSS**

The CT interobserver reliability of the SEBE-HCNNSS scale demonstrated a high Kappa value of 1, indicating strong agreement between observers. Among the cohort, 43 patients (24.29%) were identified with a high-grade SEBE-HCNNSS (scoring 3 to 5 points). Analysis showed that individuals with high-grade SEBE-HCNNSS were more often female ( $p<0.001$ ) and exhibited higher frequency of diabetes ( $n=11$ ,  $p=0.062$ ), hypertension ( $n=22$ ,  $p=0.285$ ), smoking ( $n=9$ ,  $p=0.912$ ), high Hunt-Hess grade ( $>3$ points,  $n=17$ ,  $p=0.020$ ), high Fisher grade ( $>3$ points,  $n=28$ ,  $p=0.000025$ ), and high EBES scale ( $>3$ points,  $n=22$ ,  $p<0.0001$ ) (Table S4).

Finally Cox proportional Hazards regression was performed to identify independent predictors of CI (Table S3). In the MMSE scale group (validation set), Fisher CT Grade (OR 2.172, 95% CI 1.544-3.056,  $p = 0.000008$ ), EBES scale (OR 2.585, 95% CI 1.713-3.899,  $p = 0.000006$ ), GCS scale (OR 1.027, 95% CI 0.997-7.82,  $p = 0.051$ ), SEBE-HCNNSS scale (OR 3.322, 95% CI 2.312-7.237,  $p = 0.00025$ ) were identified as predictors of CI.

## **DISCUSSION**

Our study demonstrated that the SEBE-HCNNSS scale was positively associated with increased intracranial pressure following EBI after aneurysm rupture (Figure 4). Moreover, there was a direct correlation between the pathological changes induced by EBI and distinct regions of white matter fibers. Notably, the SEBE-HCNNSS was superior to traditional scales in its predictive capability, despite differences in the focus of these scales. The development of the SEBE-HCNNSS scale emerges as a more reliable predictor for EBI and CI, establishing itself as an independent prognostic indicator.

Despite the attention paid to EBI, the potential advantages of early assessment of nerve fiber tracts have often been overlooked in clinical practice<sup>24,25</sup>. Classification

systems typically adhere to established principles within a given field. Our analysis identified predictors of high-grade SEBE-HCNNSS, including Fisher CT Grade, EBES scale, and GCS scale. In addition, our findings demonstrate varying aneurysm diameters and imaging changes in ACoA or PCoA regions are associated with an increased risk of CI. This is consistent with the pathophysiology of compression of nerve fiber bundles due to cerebral edema and hematoma lesions and in line with previous literature<sup>26</sup>. More specifically, the SEBE-HCNNSS grading may reflect the cascade of events post-extravasation of blood into the subarachnoid space, resulting in a sudden rise in intracranial pressure, subsequent decline in cerebral perfusion pressure, impaired autoregulation, and consequential damage to cerebral grey/white matter, microvasculature, and compression of nerve fiber bundles under increased pressure<sup>27</sup>. Under this model, brain anatomy may represent a physical buffer that must be depleted before the critical threshold for clinical expression of CI is reached<sup>28</sup>.

Furthermore, our results showed that SEBE-HCNNSS exhibited similar or enhanced predictive performance to traditional scales for unfavorable outcomes, edema, and CI (Figure 4). This is important as lesion studies suggest cognitive processes including attention, language, and memory rely on distributed processing within “multi-focal neural systems” rather than specific anatomical sites<sup>29</sup>. Indeed, neuroimaging highlights structural brain abnormalities as crucial risk factors for diabetic dementia, cerebral microvascular or macrovascular of diabetic complications<sup>30</sup>, Alzheimer’s disease<sup>31</sup>, metabolic dysfunction<sup>32</sup>, Cerebral small vessel disease<sup>33</sup> and fetal alcohol spectrum disorders<sup>34</sup>.

SEBE-HCNNSS is particularly valuable compared to simple cognitive exams as cognitive performance can show substantial short-term fluctuations within persons<sup>35</sup>. Currently, CI is increasingly recognized as a clinically significant complication in many diseases that affects the domains of memory, executive function, and language<sup>36</sup>. In a-SAH the increased risk of CI is especially associated with abnormal compression of brain structures with the initial severity being a strong determinant of secondary complications and functional outcome<sup>37,38</sup>. Thus, SEBE-HCNNSS represents a



valuable prognostic indicator for a-SAH from the perspective of macro-scale functional brain networks.

In summary, our findings highlight the promising predictive value of the SEBE-HCNNSS scale following aneurysm rupture. Further comprehensive investigations and larger-scale studies are warranted to establish its broader applicability and clinical utility.

## **LIMITATIONS**

The study has several limitations. First, varying quality of CT scans at different medical centers, and treatment variability may have affected accuracy of collected data and definition of function outcome. Second, although the Hunt-Hess Grade, EBES, Fisher CT Grade, and GCS are commonly used outcome rating scales, some degree of observer bias is inevitable. Third, all CT scans were evaluated by a single investigator. Fourth, although interobserver agreement of the EBES scale has been found to be good, interobserver variability in grading the amount of blood may have affected accuracy of the SEBE-HCNNSS scale.

## **CONCLUSION**

Our findings demonstrate once again that cerebral edema and hematoma after early brain injury have no visible grooves in the initial CT slice, confirming and calculating using the SEBE-HCNNSS scale established on the basis of the SEBES grading as an important predictor of CI and poor prognosis after SAH. Elucidating the anatomical imaging mechanisms by which the pathophysiology of EBI can lead to CI, the application of imaging techniques to characterize EBI after SAH will help in the development of relevant therapeutic strategies to halt the course of brain injury after SAH and improve prognosis.

## **Acknowledgements**

The authors thank the patients with SAH in the included studies and all the researchers.

## **Contributors**

All the authors listed above have been involved in substantial contributions to interpretation of data, conception, and design, drafting the article and revising it critically for important intellectual content and final approval in drafting the article, revising acquisition of data, and analysis of data. All authors were involved in drafting the article and reviewed and approved the final manuscript.

**Funding** The authors have not declared a specific grant for this research from any funding agency in the public, commercial or not-for profit sector.

**Competing interests** None.

**Ethics approval** Institutional review board, University Medical.

**Provenance and peer review** Not commissioned; externally peer reviewed.

## REFERENCES

1. Wang MD, Fu QH, Song MJ, Ma WB, Zhang JH, Wang ZX. Novel Subgroups in Subarachnoid Hemorrhage and Their Association with Outcomes-A Systematic Review and Meta-Regression. *Front Aging Neurosci.* 2021;12: 573454. doi:10.3389/fnagi.2020.573454
2. Lawton MT, Vates GE. Subarachnoid hemorrhage. *N Engl J Med.* 2017;377: 257-266. doi: 10.1016/S0140-6736(16)30668-7
3. Macdonald RL, Pluta RM, Zhang JH. Cerebral vasospasm after subarachnoid hemorrhage: the emerging revolution. *Nat Clin Pract Neurol.* 2007; 3: 256–263. doi: 10.1038/ncpneuro0490
4. Jabbarli R, Reinhard M, Niesen WD, et al. Predictors and impact of early cerebral infarction after aneurysmal subarachnoid hemorrhage. *Eur J Neurol.* 2015; 22: 941- 947. doi:10.1111/ene.12686
5. Geraghty JR, Lara-Angulo MN, Spegar M, Reeh J, Testai FD. Severe cognitive impairment in aneurysmal subarachnoid hemorrhage: Predictors and relationship to functional outcome. *J Stroke Cerebrovasc Dis.* 2020;29(9):105027. doi: 10.1016/j.jstrokecerebrovasdis.2020.105027

6. Tham W, Auchus AP, Thong M, Goh ML, Chang HM, Wong MC, et al. Progression of cognitive impairment after stroke: one years results from a longitudinal study of Singaporean stroke patients. *J Neurol Sci.* 2002; 203-204:49-52. doi: 10.1016/s0022-510x(02)00260-5
7. Shah VA, Kazmi SO, Damani R, Harris AH, Hohmann SF, Calvillo E, Suarez JI. Regional Variability in the Care and Outcomes of Subarachnoid Hemorrhage Patients in the United States. *Front Neurol.* 2022; 13:908609. doi: 10.3389/fneur.2022.908609. doi: 10.3389/fneur.2022.908609
8. Allaire JC, Marsiske M. Intraindividual variability may not always indicate vulnerability in elders' cognitive performance. *Psychol Aging.* 2005; 20, 390–401. doi: 10.1037/0882-7974.20.3.390
9. Mohanty M, Dhandapani S, Gupta SK, Shahid AH, Patra DP, Sharma A, et al. Cognitive impairments after clipping of ruptured anterior circulation aneurysms. *World Neurosurg.* 2018;117: e430–7. doi: 10.1016/j.wneu. 2018.06.048.
10. Case NF, Charlton A, Zwiers A, Batool S, McCreary CR, Hogan DB, et al. Cerebral amyloid angiopathy is associated with executive dysfunction and mild cognitive impairment. *Stroke.* 2016; 47:2010–6. doi: 10.1161/ STROKEAHA.116.012999
11. Nesselroade JR, Salthouse TA. Methodological and theoretical implications of intraindividual variability in perceptual-motor performance. *J Gerontol B Psychol Sci Soc Sci.* 2004; 59, 49–55. doi: 10.1093/geronb/59.2.p49
12. Geraghty JR, Lara-Angulo MN, Spegar M, Reeh J, Testai FD. Severe cognitive impairment in aneurysmal subarachnoid hemorrhage: Predictors and relationship to functional outcome. *J Stroke Cerebrovasc Dis.* 2020; 29(9):105027. doi: 10.1016/j.jstrokecerebrovasdis.2020.105027
13. Frontera JA, Ahmed W, Zach V, et al. Acute ischaemia after subarachnoid haemorrhage, relationship with early brain injury and impact on outcome: a prospective quantitative MRI study. *J Neurol Neurosurg Psychiatry.* 2015; 86(1):71-78. doi: 10.1136/jnnp-2013-307313

14. Hachinski V, Iadecola C, Petersen RC, Breteler MM, Nyenhuis DL, Black SE, et al. National Institute of Neurological Disorders and Stroke-Canadian Stroke Network vascular cognitive impairment harmonization standards. *Stroke*. 2006; 37:2220 – 2241. doi: 10.1161/01.STR.0000237236.88823.47
15. Felleman DJ, Van Essen DC. Distributed Hierarchical Processing in the Primate Cerebral Cortex. *Cerebral Cortex*.1991; 1:1–47. doi: 10.1093/cercor/1.1.1-a
16. Van Essen DC, Glasser MF. Parcellating Cerebral Cortex: How Invasive Animal Studies Inform Noninvasive Mapmaking in Humans. *Neuron*.2018; 99:640–663
17. Eickhoff SB, Yeo BTT, Genov S. Imaging-based parcellations of the human brain. *Nat Rev Neurosci*.2018; 19:672–686. doi: 10.1016/j.neuron.2018.07.002
18. Uddin LQ, Thomas Yeo BT, Nathan Spreng R. Towards a universal taxonomy of macro-scale functional human brain networks. *Brain Topogr*. 2019; 32:926–942.
19. Association AP. Diagnostic and statistical manual of mental disorders-iv. *American Psychiatric Association*. 1994
20. Folstein MF, Folstein SE, McHugh PR. “Mini-mental state”. A practical method for grading the cognitive state of patients for the clinician. *J Psychiatr Res*. 1975;12(3):189–198. doi: 10.1016/0022-3956(75)90026-6
21. Ahn SH, Savarraj JP, Pervez M, Jones W, Park J, Jeon SB, Kwon SU, Chang TR, Lee K, Kim DH, Day AL, Choi HA. The Subarachnoid Hemorrhage Early Brain Edema Score Predicts Delayed Cerebral Ischemia and Clinical Outcomes. *Neurosurgery*. 2018;83(1):137-145. doi: 10.1093/neuros/nyx364
22. Hunt WE, Hess RM. Surgical risk as related to time of intervention in the repair of intracranial aneurysms. *J Neurosurg*. 1968;28(1):14-20. doi: 10.3171/jns.1968.28.1.0014
23. Hlatky MA, Greenland P, Arnett DK, et al. Criteria for evaluation of novel markers of cardiovascular risk: a scientific statement from the American Heart Association. *Circulation*. 2009;119: 2408–16. doi: 10.1161/CIRCULATIONAHA.109.192278
24. Frontera JA, Ahmed W, Zach V, et al. Acute ischemia after subarachnoid hemorrhage, relationship with early brain injury and impact on outcome: a

- prospective quantitative MRI study. *J Neurol Neurosurg Psychiatry*. 2015;86(1):71-78. doi: 10.1136/jnnp-2013-307313
25. Chen S, Feng H, Sherchan P, et al. Controversies and evolving new mechanisms in subarachnoid hemorrhage. *Prog Neurobiol*. 2014;115: 64-91. doi:
26. Sussman ES, Kellner CP, Mergeche JL, Bruce SS, McDowell MM, Heyer EJ, Connolly ES. Radiographic absence of the posterior communicating arteries and the prediction of cognitive dysfunction after carotid endarterectomy. *J Neurosurg*. 2014;121(3):593-8. doi: 10.1016/j.pneurobio.2013.09.002
27. Claassen J, Vu A, Kreiter KT, et al. Effect of acute physiologic derangements on outcome after subarachnoid hemorrhage. *Crit Care Med*. 2004; 32: 832-838. doi: 10.1097/01.ccm.0000114830.48833.8a
28. Ingber AP, Hassenstab J, Fagan AM, Benzinger TL, Grant EA, Holtzman DM, Morris JC, Roe CM. Cerebrospinal Fluid Biomarkers and Reserve Variables as Predictors of Future "Non-Cognitive" Outcomes of Alzheimer's Disease. *J Alzheimers Dis*. 2016;52(3):1055-64. doi: 10.3233/JAD-150478
29. Mesulam MM. Large-scale neurocognitive networks and distributed processing for attention, language, and memory. *Ann Neurol*. 1990; 28:597–613. doi: 10.1002/ana.410280502
30. Biessels GJ, Strachan MW, Visseren FL, Kappelle LJ, Whitmer RA. Dementia and cognitive decline in type 2 diabetes and prediabetic stages: towards targeted interventions. *Lancet Diabetes Endocrinol*. 2014;2:246 – 255. doi: 10.1016/S2213-8587(13)70088-3
31. Chandra A, Dervenoulas G, Politis M. Magnetic resonance imaging in Alzheimer's disease and mild cognitive impairment. *J Neurol*. 2019; 266(6):1293-1302. doi: 10.1007/s00415-018-9016-3
32. Tang X, Zhao W, Lu M, Zhang X, Zhang P, Xin Z, Sun R, Tian W, et al. Relationship between Central Obesity and the incidence of Cognitive Impairment and Dementia from Cohort Studies Involving 5,060,687 Participants. *Neurosci Biobehav Rev*. 2021;130: 301-313. doi: 10.1016/j.neubiorev.2021.08.028

33. Duering M, Biessels GJ, Brodtmann A, Chen C, Cordonnier C, de Leeuw FE, Debette S, Frayne R, Jouvent E, Rost NS, Ter Telgte A, et al. Neuroimaging standards for research into small vessel disease-advances since 2013. *Lancet Neurol.* 2023;22(7):602-618. doi: 10.1016/S1474-4422(23)00131-X
34. Wozniak JR, Riley EP, Charness ME. Clinical presentation, diagnosis, and management of fetal alcohol spectrum disorder. *Lancet Neurol.* 2019;18(8):760-770. doi:10.1016/S1474-4422(19)30150-4
35. Allaire JC, Marsiske M. Intraindividual variability may not always indicate vulnerability in elders' cognitive performance. *Psychol Aging.* 2005; 20, 390–401. doi:10.1037/0882-7974.20.3.390
36. Al-Khindi T, Macdonald RL, Schweizer TA. Cognitive and functional outcome after aneurysmal subarachnoid hemorrhage. *Stroke.* 2010;41(8):e519-36. doi: 10.1161/STROKEAHA.110.581975
37. Frontera JA, Claassen J, Schmidt JM, et al. Prediction of symptomatic vasospasm after subarachnoid hemorrhage: the modified fisher scale. *Neurosurgery.* 2006; 59 (1): 21-27. doi:10. 1227/01.neu.0000243277.86222.6c
38. Lee VH, Ouyang B, John S, et al. Risk stratification for the in-hospital mortality in subarachnoid hemorrhage: the HAIR score. *Neurocrit Care.* 2014; 21: 14-19. doi:10.1007/s12028-013-9952-9
39. Kotekar N, Shenkar A, Nagaraj R. Postoperative cognitive dysfunction - current preventive strategies. *Clin Interv Aging.* 2018;13: 2267-2273. doi:10.2147/ CIA. S133896

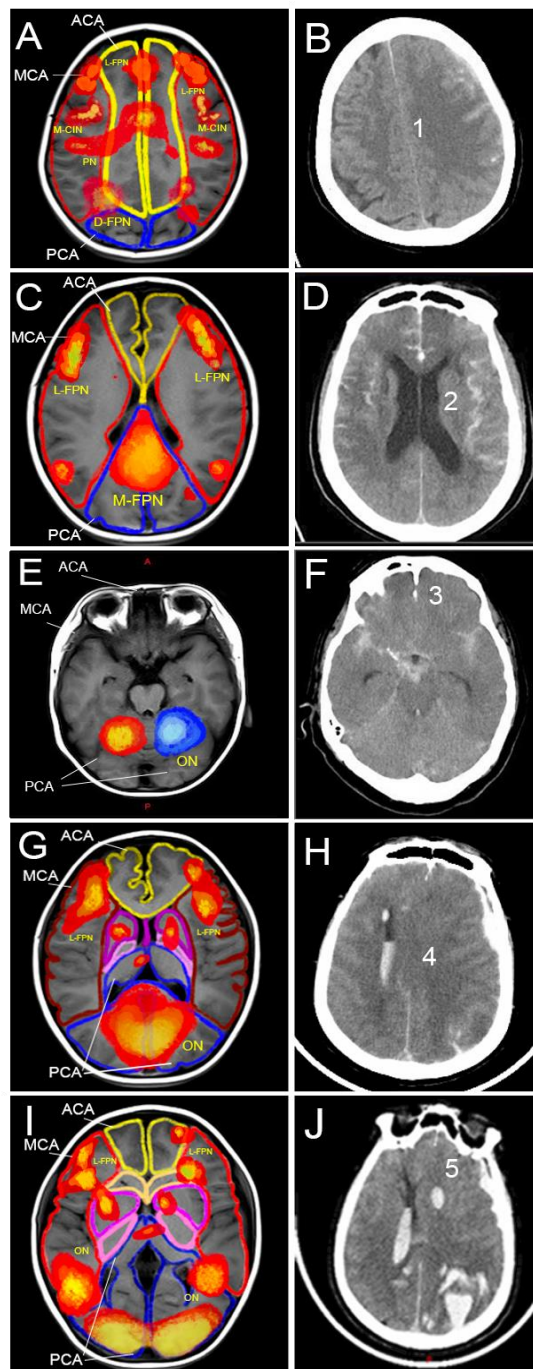

**Figure 1.** A, C, E G and I images show the distribution of different regions of cerebral arterial supply. Outlined in three different colors, yellow, red and blue. Yellow, red and blue refer to the broad cognitive domains with which a given anatomical system is most commonly associated. The B, D, F, H, J images show grade 5 of SEBE-HCNNSS with the effacement of sulci at 2 predetermined levels in each hemisphere, and the compression of cognitive network areas in the functional

white matter regions.

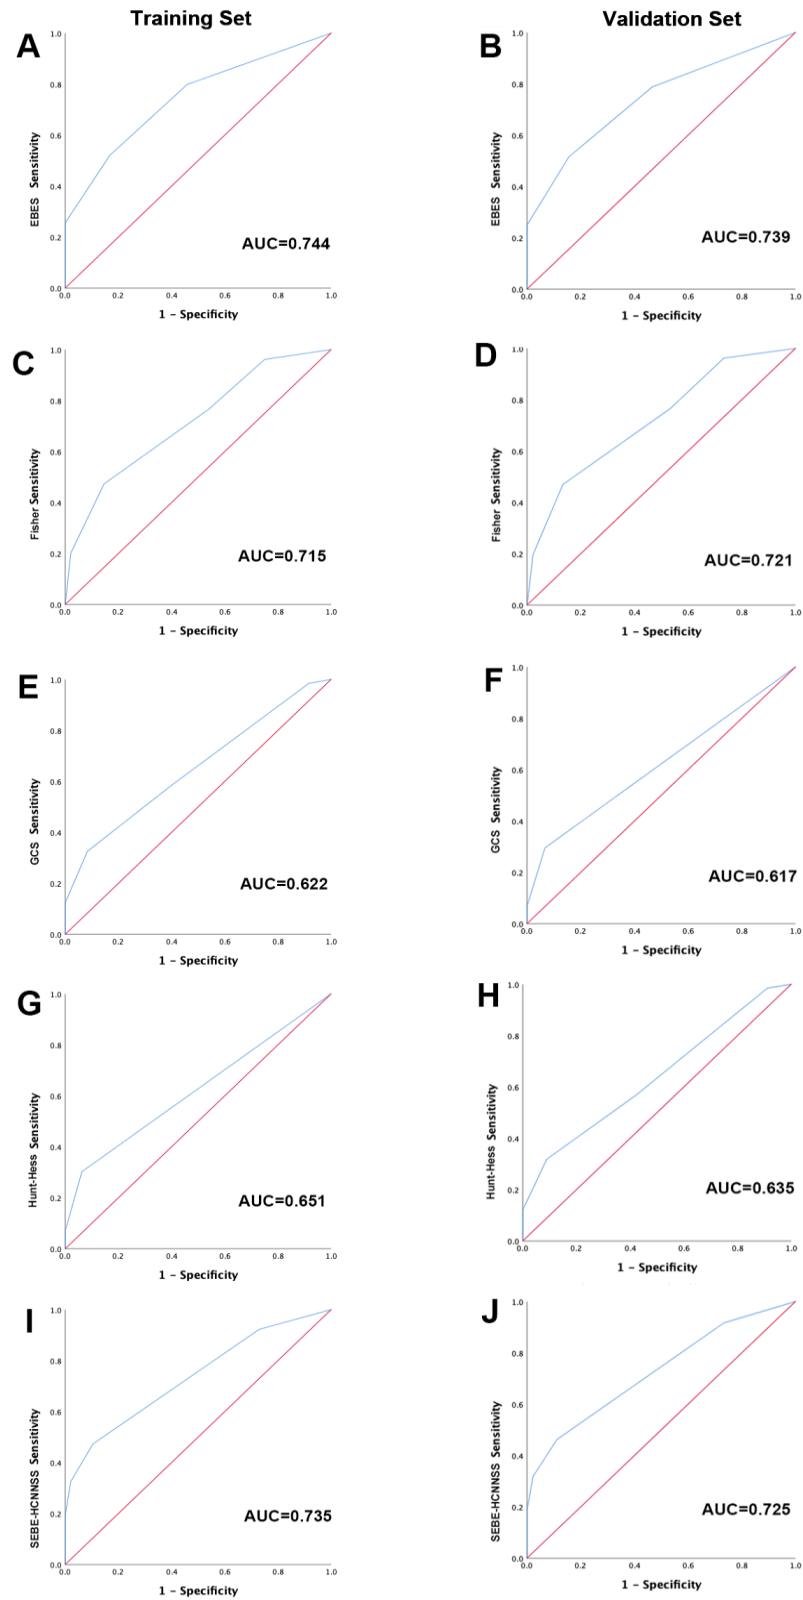

**Figure 2.** Receiver-operating characteristic (ROC) curve for prediction of unfavorable outcome and according to the clinical and radiographic grades. For all variables, SEBE-HCNNSS and the EBES scale provided essentially the same maximum area



under the curve (AUC).

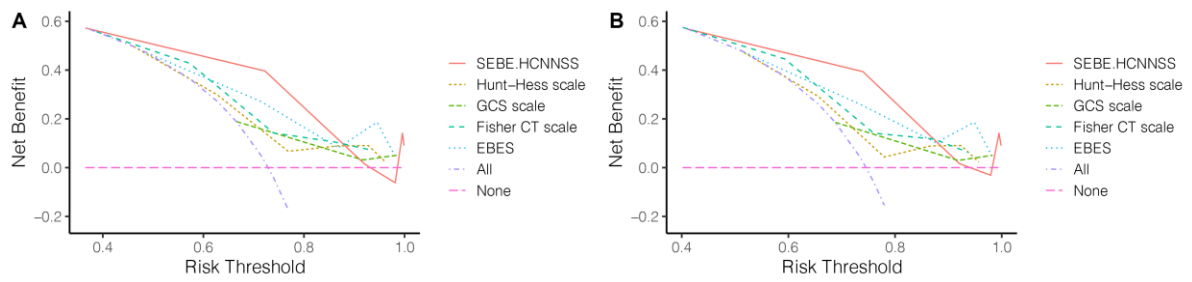

**Figure 3.** DCA curve for validating the clinical utility of the various scale. Left: DCA curve for SEBE-HCNNSS, Hunt-Hess Grade, GCS scale, Fisher CT Grade, and EBES scale in the training cohort. Right: DCA curve for SEBE-HCNNSS, Hunt-Hess Grade, GCS scale, Fisher CT Grade, and EBES scale in the validation cohort.

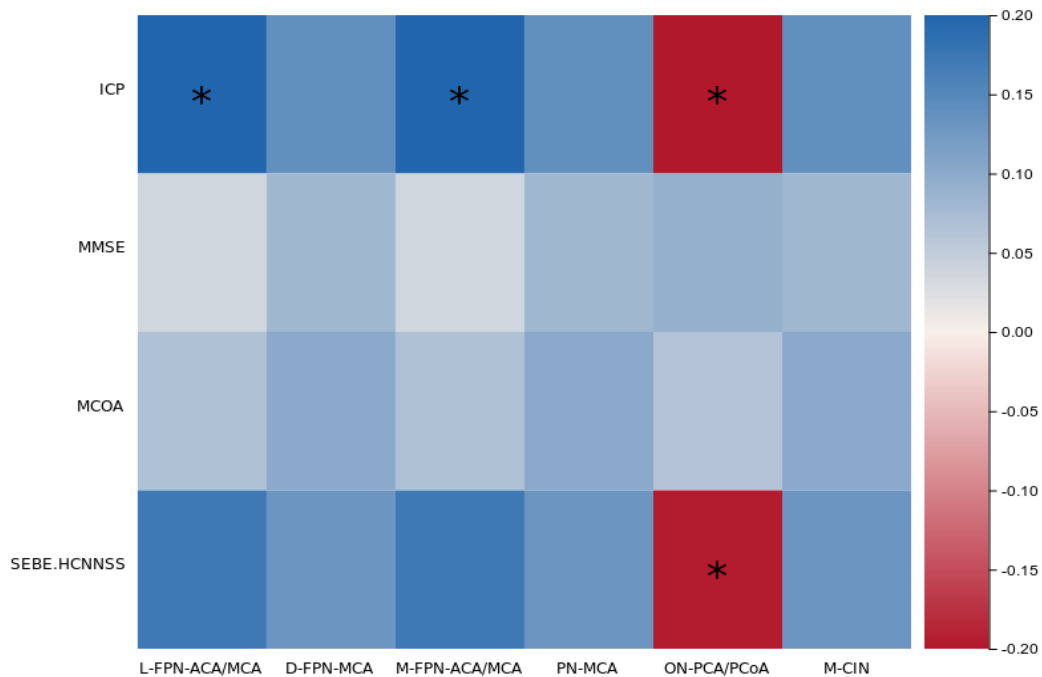

**Figure 4.** Correlation of location of arterial anatomical location and compressed nerve fibres tracts with SEBE-HCNNSS as well as MMSE and MOCA scoring models, the presence of cognitive deficits in high and low MMSE and MOCA scores correlated weaker with intracranial location than with SEBE-HCNNSS. ICP was negatively correlated with PCA  $r=-0.162$ ,  $p=0.031$ ; SEBE-HCNNSS was significantly correlated with aneurysm located in PCA compressing nerve fibre tracts presenting with cognitive impairment  $r=-0.161$ ,  $p<0.05$

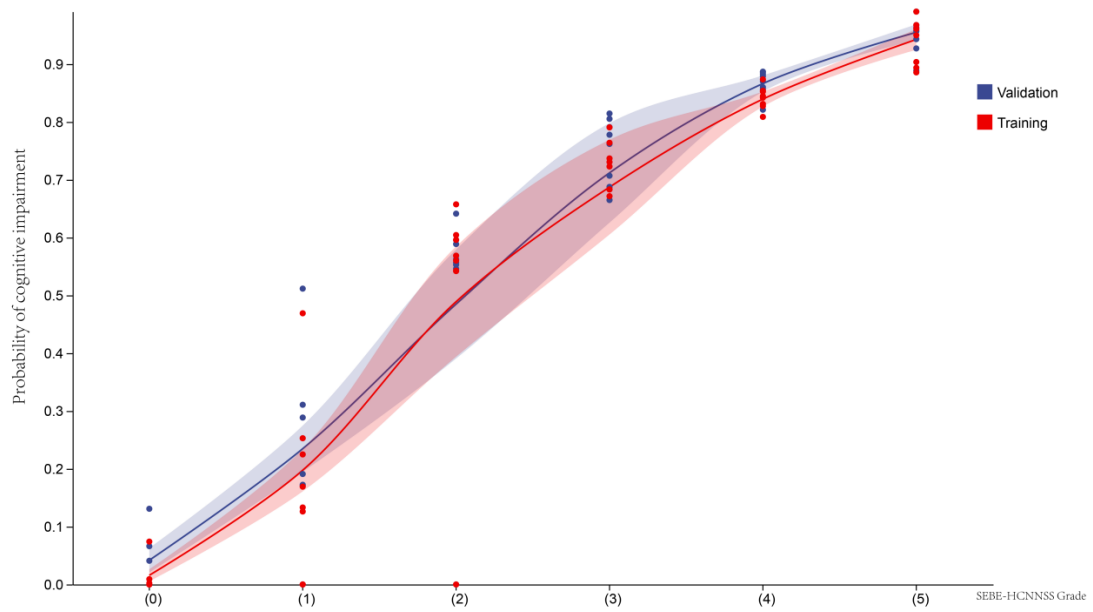

**Figure 5.** A comparison of the incidence of cognitive impairment in train (MoCA scale group) and validation (MMSE scale group) sets.
